# Supplementary material for: Analysis of Biomechanical Properties of the Lumbar Extensor Myofascia in Elderly Patients with Chronic Low Back Pain and That in Healthy People
Source: Biomed Res Int. 2020 Feb 18;2020:7649157. doi: 10.1155/2020/7649157 (PMC7049445; doi:10.1155/2020/7649157)
Supplement: Supplementary Materials — include a data set for this study, including participants in the chronic low back pain group and the control group. The data collection method has been described in detail in the manuscript, and the relevant results obtained have been discussed in the manuscript. According to the requirements of the ethics committee, the author has anonymized the data set to protect participants' privacy. There are no other restrictions on access to the data set. [file 7649157.f1.xlsx]

## Sheet: CLBP group
	CLBP group
	Number	Gender	Age	Height	Body weight	BMI	Operator	Side	Frequency	One-sided mean	Bilateral mean	Stiffness	One-sided mean	Bilateral mean	Decrement	One-sided mean	Bilateral mean	JOA score	VAS score	Course of disease (month)	Cobb angle
	201853001	female	77	148	61.8	28.2	operator 1	Left	15.1	15.5	15.025	260	265.5	259	1.52	1.41	1.48	20	4	60	39
							operator 2	Left	15.9			271			1.3
							operator 1	Right	14.5	14.55		242	252.5		1.56	1.55
							operator 2	Right	14.6			263			1.54
	201853002	female	63	155	68.7	28.6	operator 1	Left	15.5	15.75	15.925	266	254.5	249.25	1.24	1.17	1.0825	22	3	36	53
							operator 2	Left	16			243			1.1
							operator 1	Right	15.5	16.1		252	244		0.99	0.995
							operator 2	Right	16.7			236			1
	201853003	female	66	158	49.9	20	operator 1	Left	17.5	17.8	17.15	407	394.5	372.75	1.65	1.76	1.765	18	6	12	39
							operator 2	Left	18.1			382			1.87						39
							operator 1	Right	16.1	16.5		364	351		1.78	1.77					39
							operator 2	Right	16.9			338			1.76						39
	201853004	female	78	153	49.6	21.2	operator 1	Left	18.5	18.9	18.7	458	470.5	475.5	1.51	1.405	1.3975	11	7	60	7
							operator 2	Left	19.3			483			1.3						7
							operator 1	Right	18.4	18.5		491	480.5		1.38	1.39					7
							operator 2	Right	18.6			470			1.4						7
	201853005	female	62	145	49.8	23.7	operator 1	Left	14.7	14.15	14.375	235	225.5	230.75	1.28	1.165	1.18	21	2	3	48
							operator 2	Left	13.6			216			1.05					3	48
							operator 1	Right	15.2	14.6		249	236		1.17	1.175				3	48
							operator 2	Right	14			223			1.18					3	48
	201853006	female	71	155	58.9	24.5	operator 1	Left	18.3	18.35	18.6	369	379.5	385.5	1.5	1.57	1.5775	16	5	48	39
							operator 2	Left	18.4			390			1.64					48	39
							operator 1	Right	18.9	18.85		410	391.5		1.67	1.585				48	39
							operator 2	Right	18.8			373			1.5					48	39
	201853007	female	63	150	49.7	22.1	operator 1	Left	11.7	11.75	12.125	160	172	178	1.18	1.19	1.17	20	4	3	51
							operator 2	Left	11.8			184			1.2					3	51
							operator 1	Right	13.5	12.5		172	184		1.25	1.15				3	51
							operator 2	Right	11.5			196			1.05					3	51
	201853008	female	75	143	50.7	24.8	operator 1	Left	14	14.1	14.4	230	243	253.25	1.3	1.285	1.255	21	3	204	57
							operator 2	Left	14.2			256			1.27					204	57
							operator 1	Right	14.1	14.7		273	263.5		1.1	1.225				204	57
							operator 2	Right	15.3			254			1.35					204	57
	201853009	female	50	159	59.9	23.7	operator 1	Left	17.2	17.45	16.875	286	302.5	286.5	1	1.07	1.125	20	4	60	36
							operator 2	Left	17.7			319			1.14					60	36
							operator 1	Right	16	16.3		260	270.5		1.15	1.18				60	36
							operator 2	Right	16.6			281			1.21					60	36
	201853010	female	62	164	54.3	20.2	operator 1	Left	13.5	14.2	14.05	280	267.5	257.25	1.78	1.665	1.52	24	3	120	43
							operator 2	Left	14.9			255			1.55					120	43
							operator 1	Right	14	13.9		235	247		1.33	1.355				120	43
							operator 2	Right	13.8			259			1.38					120	43
	201853011	female	67	160	64.8	25.3	operator 1	Left	16.8	16.75	16.15	375	357.5	348.25	2.46	2.34	2.265	18	5	10	38
							operator 2	Left	16.7			340			2.22					10	38
							operator 1	Right	15.7	15.55		326	339		2.28	2.19				10	38
							operator 2	Right	15.4			352			2.1					10	38
	201853012	female	54	145	54.7	26	operator 1	Left	13.1	12.8	12.925	196	184	187	1.3	1.185	1.0975	23	2	96	44
							operator 2	Left	12.5			172			1.07					96	44
							operator 1	Right	13.2	13.05		209	190		1	1.01				96	44
							operator 2	Right	12.9			171			1.02					96	44
	201853013	female	61	160	55.3	21.6	operator 1	Left	15.1	14.6	14.625	239	249.5	253.5	1.3	1.295	1.23	22	3	3	39
							operator 2	Left	14.1			260			1.29					3	39
							operator 1	Right	14.8	14.65		275	257.5		1.2	1.15				3	39
							operator 2	Right	14.5			240			1.1					3	39
	201853014	female	56	159	62.7	24.8	operator 1	Left	14.9	14.95	15.15	287	275	279.75	1.28	1.4	1.515	20	4	120	33
							operator 2	Left	15			263			1.52					120	33
							operator 1	Right	15.5	15.35		295	284.5		1.6	1.63				120	33
							operator 2	Right	15.2			274			1.66					120	33
	201853015	female	67	153	60.6	25.9	operator 1	Left	18	18.25	17.85	360	367.5	362.5	1.43	1.545	1.5975	19	6	96	43
							operator 2	Left	18.5			375			1.66					96	43
							operator 1	Right	17.3	17.45		355	357.5		1.6	1.65				96	43
							operator 2	Right	17.6			360			1.7					96	43
	201853016	female	68	161	62.5	24.1	operator 1	Left	14.3	14.45	14.975	274	260	263.5	1.61	1.59	1.475	20	4	36	34
							operator 2	Left	14.6			246			1.57					36	34
							operator 1	Right	14.3	15.5		254	267		1.32	1.36				36	34
							operator 2	Right	16.7			280			1.4					36	34
	201853017	female	56	160	55.6	21.7	operator 1	Left	12.1	11.8	12.325	179	189.5	193.25	1.2	1.2	1.13	23	3	60	29
							operator 2	Left	11.5			200			1.2					60	29
							operator 1	Right	12.5	12.85		180	197		1.12	1.06				60	29
							operator 2	Right	13.2			214			1					60	29
	201853018	female	61	168	77.1	27.3	operator 1	Left	17.5	17.5	17.2	315	327	320.25	1.54	1.55	1.46	13	6	120	41
							operator 2	Left	17.5			339			1.56					120	41
							operator 1	Right	17	16.9		301	313.5		1.44	1.37				120	41
							operator 2	Right	16.8			326			1.3					120	41
	201853019	female	77	157	59.7	24.2	operator 1	Left	14.4	14.45	14.025	245	251	244	1.37	1.39	1.39	23	3	120	37
							operator 2	Left	14.5			257			1.41					120	37
							operator 1	Right	13.7	13.6		242	237		1.43	1.39				120	37
							operator 2	Right	13.5			232			1.35					120	37
	201853020	female	72	153	63.2	27	operator 1	Left	14.2	14.1	13.525	255	242.5	243.5	1.36	1.34	1.315	22	3	36	55
							operator 2	Left	14			230			1.32					36	55
							operator 1	Right	13	12.95		230	244.5		1.27	1.29				36	55
							operator 2	Right	12.9			259			1.31					36	55
	201854001	male	70	178	68.8	21.7	operator 1	Left	16	15.95	15.9	364	351.5	349.25	2.14	2.11	1.99	19	4	3	54
							operator 2	Left	15.9			339			2.08					3	54
							operator 1	Right	15.7	15.85		335	347		1.86	1.87				3	54
							operator 2	Right	16			359			1.88					3	54
	201854002	male	66	156	65.5	26.9	operator 1	Left	14.5	14.8	14.5	242	231	221.5	1.09	1.08	1.015	22	3	3	54
							operator 2	Left	15.1			220			1.07					3	54
							operator 1	Right	14	14.2		200	212		0.96	0.95				3	54
							operator 2	Right	14.4			224			0.94					3	54
	201854003	male	62	174	73	24.1	operator 1	Left	19.9	20.2	19.925	473	461.5	439.75	1.74	1.73	1.76	16	6	18	51
							operator 2	Left	20.5			450			1.72					18	51
							operator 1	Right	19.9	19.65		426	418		1.73	1.79				18	51
							operator 2	Right	19.4			410			1.85					18	51
	201854004	male	50	170	48.8	16.9	operator 1	Left	19.1	19.15	18.75	383	396	395	1.52	1.5	1.475	18	5	18	39
							operator 2	Left	19.2			409			1.48					18	39
							operator 1	Right	18.4	18.35		406	394		1.46	1.45				18	39
							operator 2	Right	18.3			382			1.44					18	39
	201854005	male	75	169	72	25.2	operator 1	Left	16.1	16.25	16.625	349	351.5	359.75	2.25	2.24	2.195	13	6	120	34
							operator 2	Left	16.4			354			2.23					120	34
							operator 1	Right	17.5	17		355	368		2.1	2.15				120	34
							operator 2	Right	16.5			381			2.2					120	34
	201854006	male	76	169	70.2	26.1	operator 1	Left	15.8	15.9	15.575	291	304.5	298.5	1.95	1.955	1.8875	25	2	60	34
							operator 2	Left	16			318			1.96					60	34
							operator 1	Right	15.1	15.25		303	292.5		1.82	1.82				60	34
							operator 2	Right	15.4			282			1.82					60	34
	201854007	male	73	170	84.4	29.2	operator 1	Left	19.7	19.65	19.425	392	391.5	388.5	1.6	1.565	1.5875	19	5	168	42
							operator 2	Left	19.6			391			1.53					168	42
							operator 1	Right	18.5	19.2		382	385.5		1.6	1.61				168	42
							operator 2	Right	19.9			389			1.62					168	42
	201854008	male	67	158	59.4	23.8	operator 1	Left	19.8	19.15	19	400	412.5	404.25	1.73	1.63	1.64	17	6	60	36
							operator 2	Left	18.5			425			1.53					60	36
							operator 1	Right	18.5	18.85		407	396		1.66	1.65				60	36
							operator 2	Right	19.2			385			1.64					60	36
	201854009	male	64	180	71.9	22.2	operator 1	Left	15.8	16.1	15.65	277	291	286.75	1.42	1.46	1.45	22	3	6	51
							operator 2	Left	16.4			305			1.5					6	51
							operator 1	Right	14.9	15.2		294	282.5		1.32	1.44				6	51
							operator 2	Right	15.5			271			1.56					6	51
	201854010	male	65	155	63.7	26.5	operator 1	Left	18.4	18.25	18.15	373	362.5	364	1.5	1.48	1.55	15	6	36	38
							operator 2	Left	18.1			352			1.46					36	38
							operator 1	Right	18.4	18.05		367	365.5		1.6	1.605				36	38
							operator 2	Right	17.7			364			1.61					36	38
	201854011	male	54	173	76.9	25.7	operator 1	Left	17	17.5	17.625	359	370.5	389.75	1.58	1.44	1.425	23	2	12	34
							operator 2	Left	18			382			1.3					12	34
							operator 1	Right	17.9	17.75		419	409		1.5	1.41				12	34
							operator 2	Right	17.6			399			1.32					12	34
	201854012	male	65	173	67.9	22.7	operator 1	Left	17.8	16.8	17.475	398	385	402	1.46	1.38	1.45	11	6	48	49
							operator 2	Left	15.8			372			1.3					48	49
							operator 1	Right	18.4	18.15		408	419		1.5	1.52				48	49
							operator 2	Right	17.9			430			1.54					48	49
	201854013	male	51	174	66.9	22.1	operator 1	Left	16.9	16.8	16.45	360	348	325.75	1.77	1.76	1.55	16	6	3	40
							operator 2	Left	16.7			336			1.75					3	40
							operator 1	Right	16	16.1		314	303.5		1.3	1.34				3	40
							operator 2	Right	16.2			293			1.38					3	40
	201854014	male	64	162	54.8	20.9	operator 1	Left	19.5	20	20.1	406	393	417.5	1.47	1.46	1.82	18	5	24	42
							operator 2	Left	20.5			380			1.45					24	42
							operator 1	Right	20.4	20.2		453	442		2.16	2.18				24	42
							operator 2	Right	20			431			2.2					24	42
	201854015	male	60	172	66.9	22.6	operator 1	Left	19.8	18.9	19.375	356	370	380.5	1.39	1.4	1.41	17	5	18	40
							operator 2	Left	18			384			1.41					18	40
							operator 1	Right	19.5	19.85		376	391		1.44	1.42				18	40
							operator 2	Right	20.2			406			1.4					18	40
	201854016	male	50	170	65	22.5	operator 1	Left	16	15.9	16.075	313	300	292.75	1.21	1.12	1.17	21	3	3	49
							operator 2	Left	15.8			287			1.03					3	49
							operator 1	Right	16.4	16.25		274	285.5		1.3	1.22				3	49
							operator 2	Right	16.1			297			1.14					3	49
	201854017	male	53	168	69.1	24.5	operator 1	Left	16.6	16.9	16.975	363	351	355	1.22	1.205	1.25	18	5	12	33
							operator 2	Left	17.2			339			1.19					12	33
							operator 1	Right	17.2	17.05		371	359		1.35	1.275				12	33
							operator 2	Right	16.9			347			1.2					12	33
	201854018	male	53	169	72.3	25.3	operator 1	Left	17.7	17.55	17.5	358	346	346.25	1.25	1.235	1.2675	16	4	60	28
							operator 2	Left	17.4			334			1.22					60	28
							operator 1	Right	18.6	17.45		360	346.5		1.35	1.3				60	28
							operator 2	Right	16.3			333			1.25					60	28
	201854019	male	50	170	69.6	24.1	operator 1	Left	17.5	17	16.65	362	353.5	346.25	1.91	1.82	1.64	22	4	15	36
							operator 2	Left	16.5			345			1.73					15	36
							operator 1	Right	16.4	16.3		330	339		1.42	1.46				15	36
							operator 2	Right	16.2			348			1.5					15	36
	201854020	male	61	171	67.5	23.1	operator 1	Left	17.5	17.8	18.025	325	337.5	362.5	1.42	1.435	1.4175	14	4	4	32
							operator 2	Left	18.1			350			1.45					4	32
							operator 1	Right	18	18.25		399	387.5		1.35	1.4				4	32
							operator 2	Right	18.5			376			1.45					4	32

## Sheet: Control group
	Control group
	Number	Gender	Age	Height	Body weight	BMI	Operator	Side	Frequency	One-sided mean	Bilateral mean	Stiffness	One-sided mean	Bilateral mean	Decrement	One-sided mean	Bilateral mean	Cobb angle
	201851001	female	66	154	56.4	23.8	operator 1	Left	12.7	12.75	13.425	227	228.5	244	1.46	1.475	1.4475	36
							operator 2	Left	12.8			230			1.49
							operator 1	Right	13.6	14.1		259	259.5		1.44	1.42
							operator 2	Right	14.6			260			1.4
	201851002	female	61	154	60	25.3	operator 1	Left	14.9	14.85	15.175	230	234.5	256.75	1.1	1.12	1.09	43
							operator 2	Left	14.8			239			1.14
							operator 1	Right	15.4	15.5		277	279		1.12	1.06
							operator 2	Right	15.6			281			1
	201851003	female	60	159	65	25.7	operator 1	Left	14.2	14.6	15.75	288	279.5	313.25	1.5	1.53	1.565	38
							operator 2	Left	15			271			1.56
							operator 1	Right	16.3	16.9		355	347		1.57	1.6
							operator 2	Right	17.5			339			1.63
	201851004	female	65	169	67.1	23.5	operator 1	Left	15.4	15.25	14.8	288	278.5	257.5	1.51	1.53	1.62	44
							operator 2	Left	15.1			269			1.55
							operator 1	Right	14.4	14.35		224	236.5		1.67	1.695
							operator 2	Right	14.3			249			1.72
	201851005	female	52	156	53.5	22	operator 1	Left	13.8	13.75	13.6	239	240.5	239.75	1.13	1.14	1.31	39
							operator 2	Left	13.7			242			1.15
							operator 1	Right	13.5	13.45		238	239		1.46	1.48
							operator 2	Right	13.4			240			1.5
	201851006	female	50	158	59.9	24	operator 1	Left	15.3	15.2	15.5	339	329.5	337.5	1.5	1.465	1.3675	33
							operator 2	Left	15.1			320			1.43
							operator 1	Right	15.9	15.8		355	345.5		1.26	1.27
							operator 2	Right	15.7			336			1.28
	201851007	female	56	163	72	27.1	operator 1	Left	14.9	15.05	15.175	262	268.5	274.5	1.01	0.99	1.145	18
							operator 2	Left	15.2			275			0.97
							operator 1	Right	15.2	15.3		274	280.5		1.32	1.3
							operator 2	Right	15.4			287			1.28
	201851008	female	66	157	67	27.2	operator 1	Left	14.2	14.3	14.4	242	235	233	1.18	1.19	1.185	47
							operator 2	Left	14.4			228			1.2
							operator 1	Right	14.5	14.5		219	231		1.19	1.18
							operator 2	Right	14.5			243			1.17
	201851009	female	62	158	58.4	23.4	operator 1	Left	13	13.25	13.2	232	226	233.25	1.34	1.375	1.4675	51
							operator 2	Left	13.5			220			1.41
							operator 1	Right	13.1	13.15		250	240.5		1.54	1.56
							operator 2	Right	13.2			231			1.58
	201851010	female	66	150	53.1	23.6	operator 1	Left	16	15.7	15.125	274	267	258.75	1.05	1.06	1.055	39
							operator 2	Left	15.4			260			1.07
							operator 1	Right	14.5	14.55		241	250.5		1.06	1.05
							operator 2	Right	14.6			260			1.04
	201851011	female	53	168	48.8	17.3	operator 1	Left	14	14.15	14.075	286	278.5	280.5	1.38	1.37	1.355	38
							operator 2	Left	14.3			271			1.36
							operator 1	Right	14.4	14		272	282.5		1.36	1.34
							operator 2	Right	13.6			293			1.32
	201851012	female	80	149	51.3	23.1	operator 1	Left	17.9	18.05	18.75	340	346.5	382	1.38	1.39	1.495	39
							operator 2	Left	18.2			353			1.4
							operator 1	Right	19.5	19.45		421	417.5		1.58	1.6
							operator 2	Right	19.4			414			1.62
	201851013	female	78	165	62.6	23	operator 1	Left	12.4	12.55	11.775	196	208	194	1.05	1.065	1.1775	42
							operator 2	Left	12.7			220			1.08
							operator 1	Right	10.9	11		191	180		1.31	1.29
							operator 2	Right	11.1			169			1.27
	201851014	female	68	151	58.8	25.8	operator 1	Left	16.1	15.9	14.15	310	298.5	269.5	1.38	1.41	1.44	46
							operator 2	Left	15.7			287			1.44
							operator 1	Right	12.8	12.4		251	240.5		1.49	1.47
							operator 2	Right	12			230			1.45
	201851015	female	69	152	52.2	19.6	operator 1	Left	14.3	14.6	14.15	231	240	240.25	1.44	1.385	1.34	28
							operator 2	Left	14.9			249			1.33
							operator 1	Right	13.9	13.7		247	240.5		1.31	1.28
							operator 2	Right	13.5			234			1.25
	201851016	female	70	155	54.4	22.1	operator 1	Left	13.1	13.15	13.125	219	219	244.75	1.22	1.23	1.245	36
							operator 2	Left	13.2			219			1.24
							operator 1	Right	13.2	13.1		270	270.5		1.23	1.26
							operator 2	Right	13			271			1.29
	201851017	female	65	158	66.6	26	operator 1	Left	15.5	15.4	15.45	267	266.5	267.25	1.16	1.155	1.225	39
							operator 2	Left	15.3			266			1.15
							operator 1	Right	15.3	15.5		264	268		1.28	1.295
							operator 2	Right	15.7			272			1.31
	201851018	female	61	157	60.8	24.3	operator 1	Left	14.3	14.5	14.1	222	230.5	223.25	1.17	1.205	1.115	53
							operator 2	Left	14.7			239			1.24
							operator 1	Right	13.6	13.7		219	216		1.04	1.025
							operator 2	Right	13.8			213			1.01
	201851019	female	67	165	49.5	18.6	operator 1	Left	12.9	13	13.225	181	182.5	198.5	1.01	1.04	1.145	39
							operator 2	Left	13.1			184			1.07
							operator 1	Right	13.5	13.45		211	214.5		1.23	1.25
							operator 2	Right	13.4			218			1.27
	201851020	female	61	161	62	25.8	operator 1	Left	15.3	15.25	15.225	277	275	276.75	1.18	1.16	1.1575	32
							operator 2	Left	15.2			273			1.14
							operator 1	Right	15.2	15.2		278	278.5		1.14	1.155
							operator 2	Right	15.2			279			1.17
	201852001	male	69	176	71.9	23.2	operator 1	Left	14	14.35	14.95	259	264	271	1.57	1.55	1.55	48
							operator 2	Left	14.7			269			1.53
							operator 1	Right	15.4	15.55		272	278		1.54	1.535
							operator 2	Right	15.7			284			1.53
	201852002	male	67	174	66	21.8	operator 1	Left	15.7	15.8	15.2	289	301	286.25	1.22	1.205	1.31	39
							operator 2	Left	15.9			313			1.19
							operator 1	Right	14.7	14.6		283	271.5		1.41	1.4
							operator 2	Right	14.5			260			1.39
	201852003	male	74	160	52.5	20.5	operator 1	Left	16.2	16.1	15.825	316	312.5	315.5	1.34	1.32	1.43	51
							operator 2	Left	16			309			1.3
							operator 1	Right	16	15.55		304	318.5		1.56	1.54
							operator 2	Right	15.1			333			1.52
	201852004	male	67	154	44.8	18.9	operator 1	Left	19.6	19.3	18.55	375	375.5	365	0.98	0.96	1.165	57
							operator 2	Left	19			376			0.94
							operator 1	Right	17.7	17.8		350	354.5		1.36	1.37
							operator 2	Right	17.9			359			1.38
	201852005	male	67	153	65.1	27.8	operator 1	Left	13.2	13.15	13.3	208	197.5	207.5	0.97	0.98	1.045	51
							operator 2	Left	13.1			187			0.99
							operator 1	Right	13.5	13.45		228	217.5		1.1	1.11
							operator 2	Right	13.4			207			1.12
	201852006	male	58	168	68.9	24.4	operator 1	Left	14.7	14.55	14.825	306	302	308	1.59	1.57	1.44	38
							operator 2	Left	14.4			298			1.55
							operator 1	Right	15	15.1		310	314		1.3	1.31
							operator 2	Right	15.2			318			1.32
	201852007	male	61	176	75	24.2	operator 1	Left	15.2	15.25	14.9	314	304	279.5	1.48	1.45	1.26	30
							operator 2	Left	15.3			294			1.42
							operator 1	Right	15.1	14.55		244	255		1.04	1.055
							operator 2	Right	14			266			1.07
	201852008	male	70	164	61.6	22.9	operator 1	Left	18.2	18.25	17.95	327	331	317.25	1.4	1.42	1.3675	39
							operator 2	Left	18.3			335			1.44
							operator 1	Right	17.8	17.65		302	303.5		1.27	1.315
							operator 2	Right	17.5			305			1.36
	201852009	male	62	168	72.8	25.8	operator 1	Left	16.3	16.65	16.65	341	355	352.5	1.54	1.525	1.5275	35
							operator 2	Left	17			369			1.51
							operator 1	Right	16.3	16.65		346	350		1.51	1.53
							operator 2	Right	17			354			1.55
	201852010	male	55	172	87.9	29.7	operator 1	Left	14.3	14.35	14.625	239	242	249.25	1.04	1.045	1.0675	46
							operator 2	Left	14.4			245			1.05
							operator 1	Right	15.2	14.9		268	256.5		1.11	1.09
							operator 2	Right	14.6			245			1.07
	201852011	male	50	165	70.8	26	operator 1	Left	16.7	16.3	16.275	300	308	314.75	1.13	1.14	1.205	40
							operator 2	Left	15.9			316			1.15
							operator 1	Right	16.6	16.25		328	321.5		1.29	1.27
							operator 2	Right	15.9			315			1.25
	201852012	male	65	161	55	21.2	operator 1	Left	14.9	14.8	15.075	250	251	264.75	1.26	1.225	1.25	31
							operator 2	Left	14.7			252			1.19
							operator 1	Right	15.4	15.35		276	278.5		1.25	1.255
							operator 2	Right	15.3			281			1.26
	201852013	male	68	172	60.1	20.3	operator 1	Left	16.9	16.6	16.75	289	281	290.25	1.23	1.185	1.245	33
							operator 2	Left	16.3			273			1.14
							operator 1	Right	17.3	16.9		310	299.5		1.32	1.305
							operator 2	Right	16.5			289			1.29
	201852014	male	71	170	70.3	24.3	operator 1	Left	14.8	14.85	15.45	234	231	246.25	1.16	1.14	1.15	25
							operator 2	Left	14.9			228			1.12
							operator 1	Right	15.6	16.05		250	261.5		1.16	1.16
							operator 2	Right	16.5			273			1.16
	201852015	male	67	160	56.1	21.9	operator 1	Left	15.3	16.05	17.125	287	312.5	335	1.68	1.7	1.48	46
							operator 2	Left	16.8			338			1.72
							operator 1	Right	18.5	18.2		367	357.5		1.28	1.26
							operator 2	Right	17.9			348			1.24
	201852016	male	62	170	72	24.9	operator 1	Left	16.1	16.2	16.025	298	297.5	292.25	1.17	1.175	1.23	37
							operator 2	Left	16.3			297			1.18
							operator 1	Right	15.8	15.85		288	287		1.22	1.265
							operator 2	Right	15.9			286			1.31
	201852017	male	63	172	66.9	22.6	operator 1	Left	15.8	15.6	16.2	305	295	310	1.27	1.28	1.215	55
							operator 2	Left	15.4			285			1.29
							operator 1	Right	17.2	16.8		344	325		1.17	1.15
							operator 2	Right	16.4			306			1.13
	201852018	male	56	164	64.1	23.8	operator 1	Left	16.8	16.85	17.075	312	314.5	327.5	1.18	1.185	1.29	25
							operator 2	Left	16.9			317			1.19
							operator 1	Right	17.3	17.3		339	340.5		1.41	1.375
							operator 2	Right	17.3			342			1.34
	201852019	male	56	167	68.7	24.6	operator 1	Left	15.2	15.45	15.725	294	299	297	1.48	1.48	1.36	34
							operator 2	Left	15.7			304			1.48
							operator 1	Right	15.8	16		287	295		1.22	1.225
							operator 2	Right	16.2			303			1.23
	201852020	male	61	172	80	27	operator 1	Left	14.5	14.6	14.775	239	235	227.75	0.99	0.985	0.945	32
							operator 2	Left	14.7			231			0.98
							operator 1	Right	14.8	14.95		220	220.5		0.9	0.905
							operator 2	Right	15.1			221			0.91
